# Supplementary material for: Buteinylated-hafnium oxide bionanoparticles for electrochemical sensing of wogonin
Source: Royal Society of Chemistry journal article supplement (doi:10.1039/d3nr04438f), 2023-01-01
Supplement: d3nr04438f1.pdf [file d3nr04438f1.pdf]

**Buteinylated-Hafnium Oxide Bionanoparticles for Electrochemical Sensing of Wogonin**

Vinoth Krishnan<sup>a,b</sup>, Moghitha Paranthaman<sup>c,#</sup>, Ramya Kanagaraj<sup>a,b</sup>,

Murugan Veerapandian<sup>a,b\*</sup>

<sup>a</sup>*Electrodics and Electrocatalysis Division, CSIR-Central Electrochemical Research Institute (CECRI), Karaikudi, 630 003, Tamil Nadu, India.*

<sup>b</sup>*Academy of Scientific & Innovative Research (AcSIR), Ghaziabad-201 002, India.*

<sup>c</sup>*Centre for Education (CFE), CSIR-Central Electrochemical Research Institute (CECRI), Karaikudi, 630 003, Tamil Nadu, India.*

<sup>#</sup>*Present address: Department of Chemistry, University of Pittsburgh, Pittsburgh, PA, USA*

\*Corresponding Author

Email: [vmurugan@cecri.res.in](mailto:vmurugan@cecri.res.in) (M. Veerapandian); Tel: +91-4565 241384

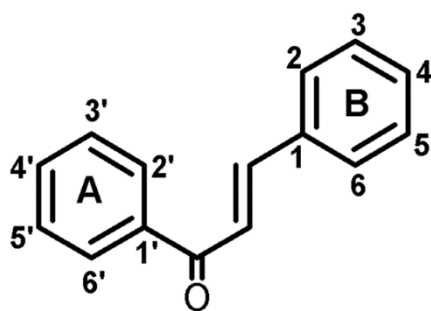

Fig.S1 illustrates the general skeletal of chalcone.

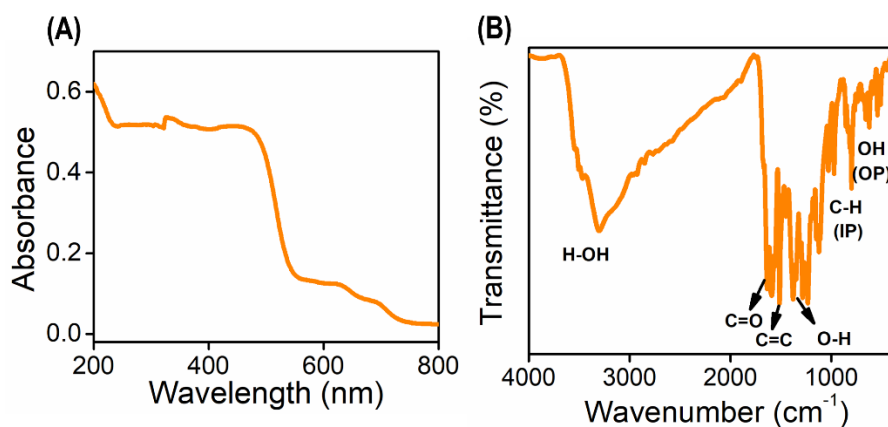

Fig.S2. UV-DRS and FTIR spectra of butein.

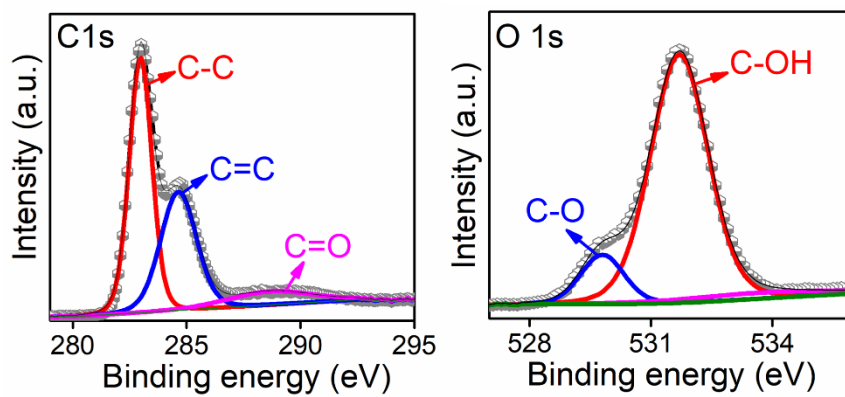

Fig.S3 XPS deconvoluted C1s and O1s spectra of butein.

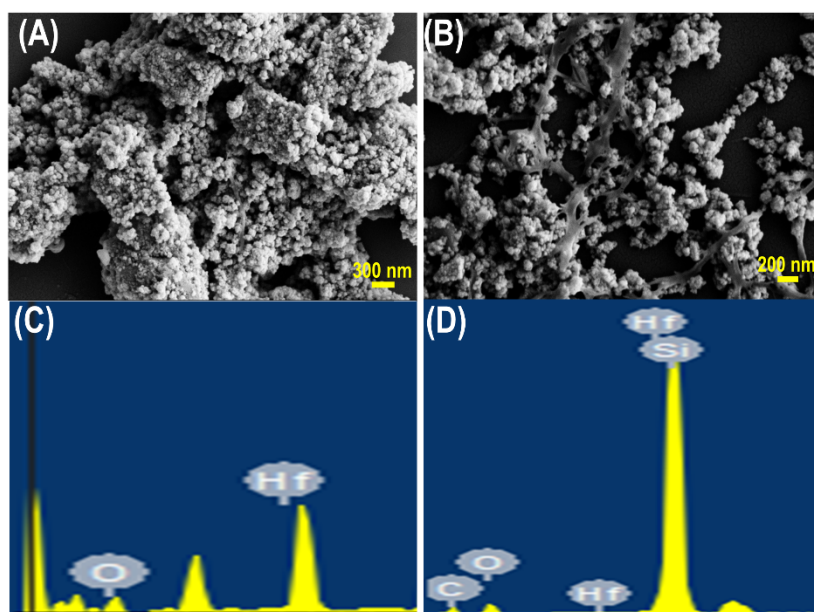

Fig.S4 FESEM and EDAX analysis of HfO<sub>2</sub> (A&C) and HfO<sub>2</sub>-B (B&D).

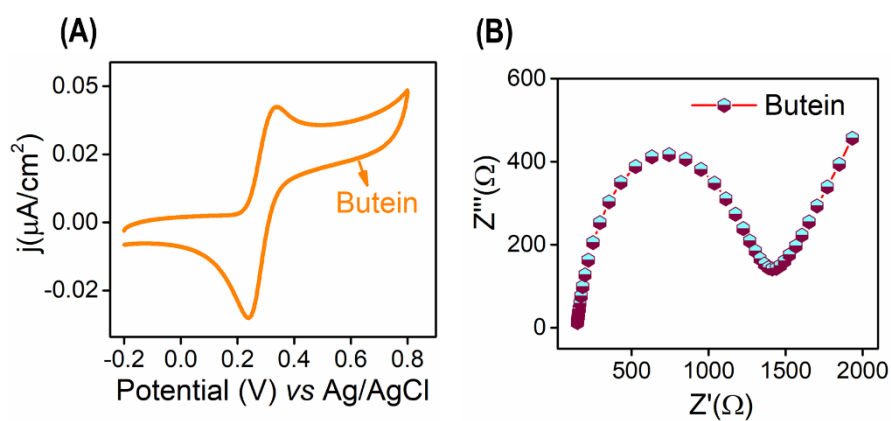

Fig.S5 CV and EIS of pristine Butein in BR buffer (pH 7) at 50 mV/s and 0.05 M of K<sub>3</sub>[Fe(CN)<sub>6</sub>] and K<sub>4</sub>[Fe(CN)<sub>6</sub>] in 0.5 M KCl solution, respectively.

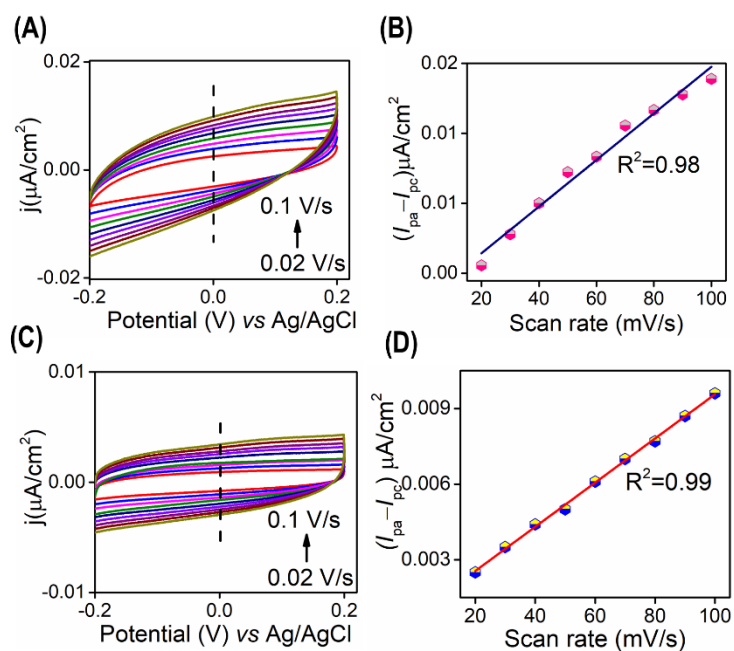

Fig.S6 (A-B) CVs of  $\text{HfO}_2$  and its linear plot. (C-D)  $\text{HfO}_2\text{-B}$  and its linear plot. Recorded in the potential window of  $-0.2$  to  $+0.2$  V at different scan rates in BR buffer (pH 7).

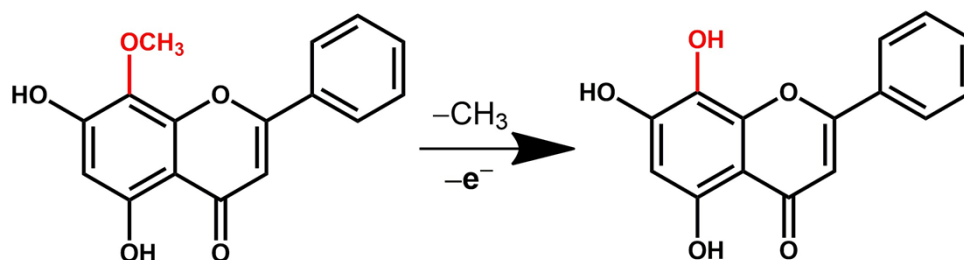

Fig. S7 Electrooxidation behaviour of WG at the  $\text{HfO}_2\text{-B}$  modified surface.

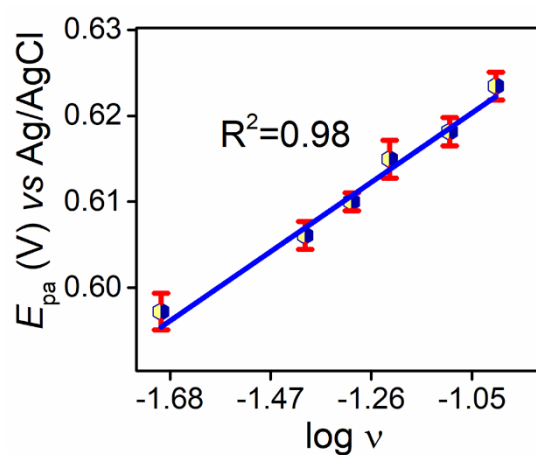

Fig.S8 Derivative plot of anodic peak potential of WG against the logarithm of scan rate.

**Table S1.** Similar polyphenols used in the sensing of various analytes

| <b>Material</b>                                        | <b>Method</b>   | <b>Technique</b>                | <b>Target</b>                    | <b>References</b> |
|--------------------------------------------------------|-----------------|---------------------------------|----------------------------------|-------------------|
| Tannic acid + Metal ions                               | Electrochemical | Anodic stripping voltammetry    | Epstein-Barr virus Infection     | 1                 |
| Catechin modified carbon paste electrode               | Electrochemical | Differential Pulse Voltammetry  | Dopamine (DA) and Serotonin (ST) | 2                 |
| Ellagic acid + Carbon quantum dots                     | Spectrochemical | Fluorescence                    | Hg <sup>2+</sup>                 | 3                 |
| Tannic acid + Copper and Zinc                          | Spectrochemical | Fluorescence                    | Nucleic acid                     | 4                 |
| Apigenin modified GCE                                  | Electrochemical | Differential pulse voltammogram | Copper ions in Soil              | 5                 |
| Molybdenum trioxide hybridized kaempferol modified GCE | Electrochemical | Amperometry                     | Immunosensor                     | 6                 |
| Butein + Hafnium oxide NPs modified GCE                | Electrochemical | Amperometry                     | Wogonin                          | This work         |

**Table S2.** Comparison of WG detection using various analytical technique.

| <b>Method</b>                                                               | <b>Material</b>                                                  | <b>Limit of detection</b> | <b>Real application</b> | <b>Reference</b> |
|-----------------------------------------------------------------------------|------------------------------------------------------------------|---------------------------|-------------------------|------------------|
| High Performance Liquid chromatography (HPLC)                               | C8 column<br>Mobile phase: Acetonitrile, Water and Diethylamine  | 0.01 µg/mL                | Rat plasma              | 7                |
| Capillary Electrophoresis                                                   | Acetonitrile + Microemulsion + Borax solution                    | 0.5 -1.2 µg/mL            | -                       | 8                |
| Electrospray Ionization Tandem Mass Spectrometry                            | C-18 column<br>Mobile phase: methanol and formic acid            | 5 ng/mL                   | Plasma                  | 9                |
| Liquid chromatography with tandem mass spectrometric detection (HPLC–MS/MS) | C-18 column<br>Mobile phase: Formic acid and Acetonitrile        | 24 ng/mL                  | Rat Plasma              | 10               |
| Ultra-performance liquid chromatography-mass spectrometry (UPLC-MS)         | C-18 column<br>Mobile phase: Methanol and Water                  | 153.87 ng/mL              | Rat plasma              | 11               |
| Electrochemical study                                                       | HfO <sub>2</sub> -B modified GCE in Britton Robinson (BR) buffer | 0.63 µM                   | Human Serum             | This work        |

## References

1. J. Huang, J. Meng, S. Chen, S. Zhang, T. Liu, C. Li and F. Wang, *Biosensors and Bioelectronics*, 2020, **164**, 112310.
2. J. Wei, J. He, C. Chen and X. Wang, *Analytical Methods*, 2015, **7**, 5641-5648.
3. J. Joseph and A. A. Anappara, *Journal of Luminescence*, 2017, **192**, 761-766.
4. H. Huang, J. Qin, G. Wang, Z. Guo, X. Yu, Y. Zhao and J. Wei, *CrystEngComm*, 2018, **20**, 7626-7630.
5. İ. E. Mülazımoğlu and A. O. Solak, *Analytical Methods*, 2011, **3**, 2534-2539.
6. G. R. Pandey, P. Kanagavalli, K. Karnam, K. Thanigai Arul, P. Monisha, C. L. Dong, J. L. Chen, M. Veerapandian and J. Nirmal, *Materials Today Chemistry*, 2022, **24**, 100809.
7. T. H. Tsai, C. J. Chou, T. R. Tsai and C. F. Chen, *Planta Med*, 1996, **62**, 263-266.
8. C. Li and Y. Xu, *Journal of the Chemical Society of Pakistan*, 2022, **34**, 350-355.
9. Y. H. Kim, D. W. Jeong, I. B. Paek, H. Y. Ji, Y. C. Kim, D. H. Sohn and H. S. Lee, *Journal of chromatography. B, Analytical technologies in the biomedical and life sciences*, 2006, **844**, 261-267.
10. D. I. Baygildieva, T. M. Baygildiev, A. N. Stavrianidi, O. A. Shpigun and I. A. Rodin, *Journal of Analytical Chemistry*, 2018, **73**, 1317-1322.
11. X.-B. Cui, X.-C. Qian, P. Huang, Y.-X. Zhang, J.-S. Li, G.-M. Yang and B.-C. Cai, 2015, **29**, 1112-1123.
